# Supplementary material
Source: publisher figshare collection journal article supplement (https://sage.figshare.com/ndownloader/files/17947796)

## Appendix 1: Lupus Palm Cards

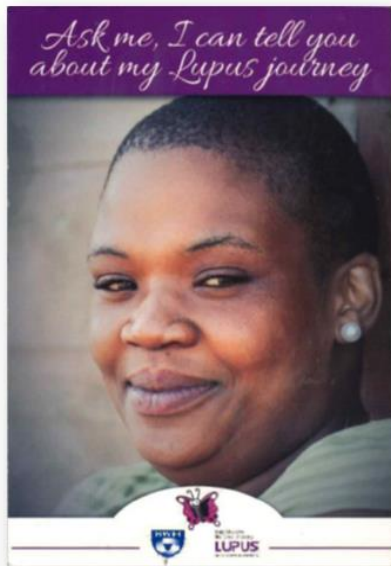

(Front)

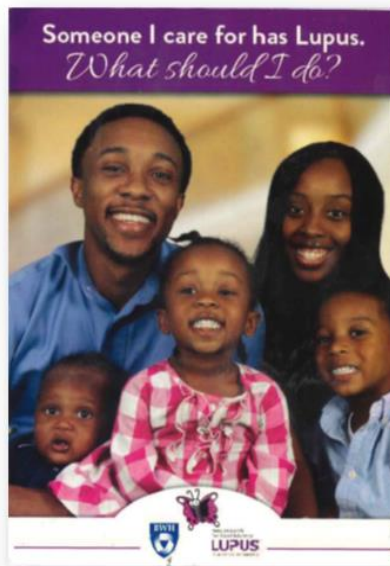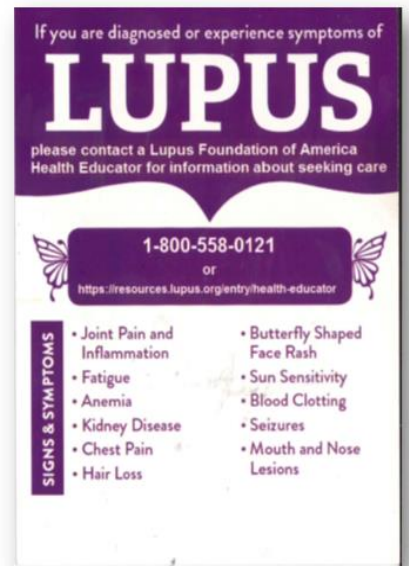

(Back)

Supplement: Supplementary file 1 [file 17947796]
